# Supplementary material
Source: Springer Nature journal article supplement (https://www.springermedizin.de/resource/supplementary/12967_2011_791_MOESM2_ESM.pdf/9577070)

BL10

Uninfected Mdx

AAV.SERCA2a  
Infected Mdx

HE

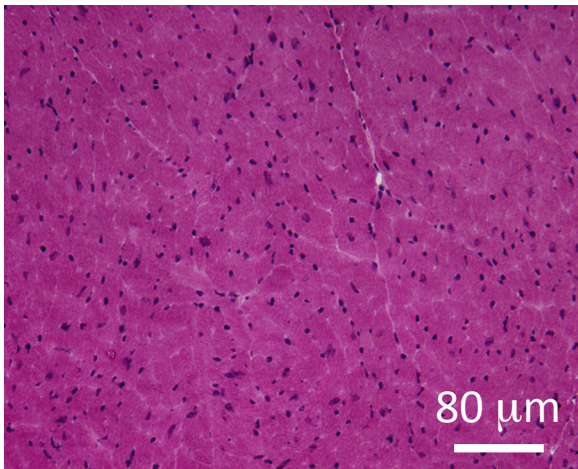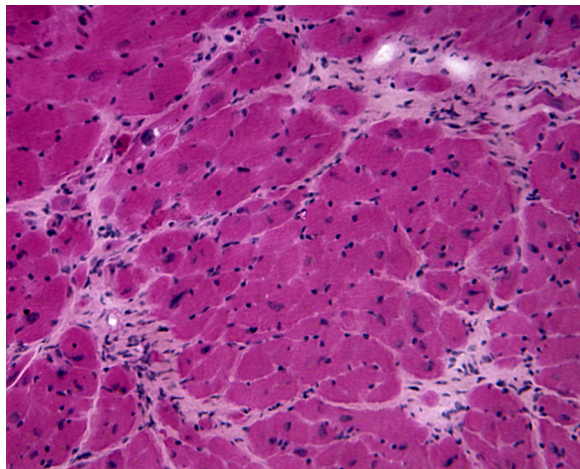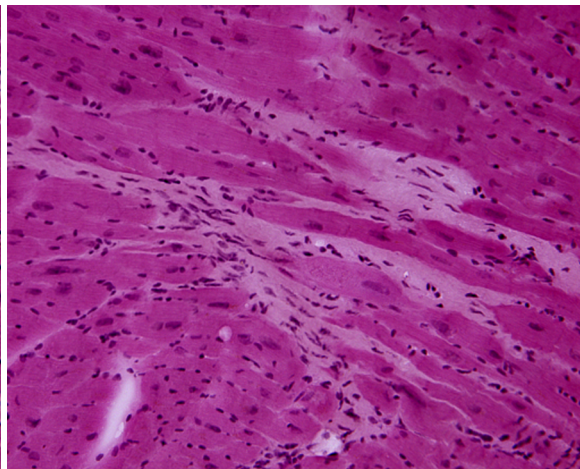

Masson Trichrome

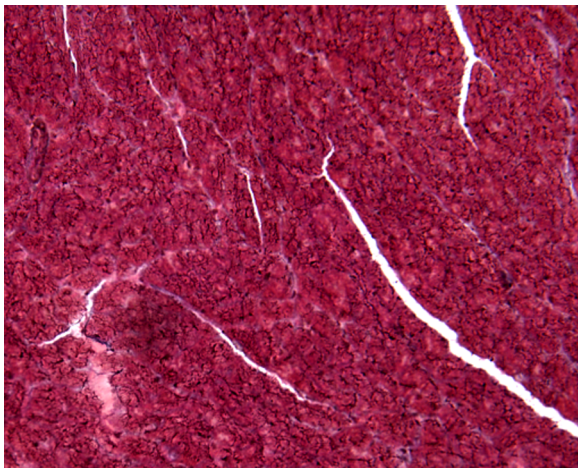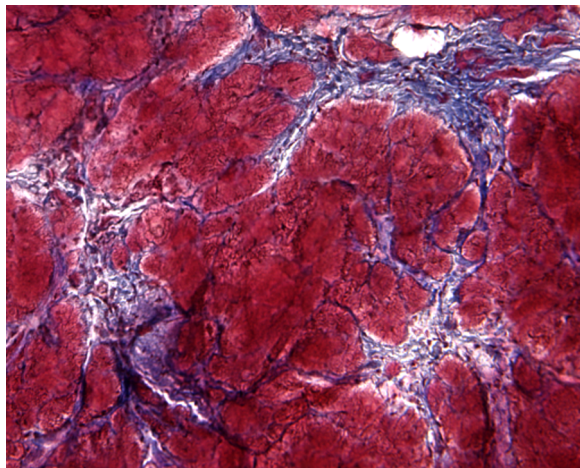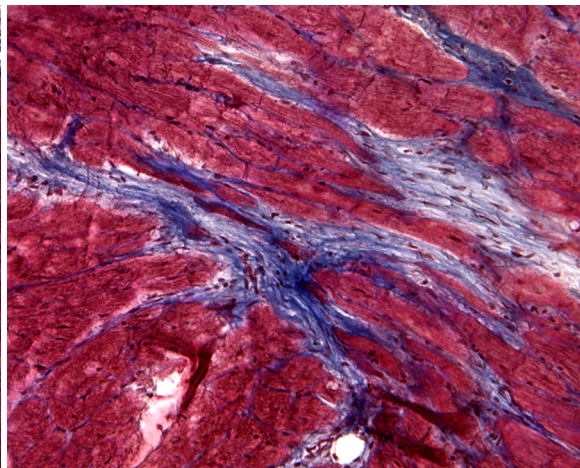

Supplement: MOESM2 [file 9577070]
